# Supplementary material for: Two temperature-induced isomers of metal-carboxylate frameworks based on different linear trinuclear Co3(RCOO)8 clusters exhibiting different magnetic behaviours
Source: Royal Society of Chemistry journal article supplement (doi:10.1039/c003032e), 2010-01-01
Supplement: c003032e.pdf [file c003032e.pdf]

## Supporting Information

# Two Temperature-induced Isomers of Metal-Carboxylate Frameworks Based on Different Linear Trinuclear $\text{Co}_3(\text{RCOO})_8$ Clusters exhibiting Different Magnetic Behaviours

Xiao-Feng Wang,<sup>a,b</sup> Yue-Biao Zhang,<sup>a</sup> Wei Xue,<sup>a</sup> Xiao-Lin Qi,<sup>a</sup> and Xiao-Ming Chen<sup>a\*</sup>

<sup>a</sup> MOE Key Laboratory of Bioinorganic & Synthetic Chemistry, State Key Laboratory of Optoelectronic Materials, School of Chemistry and Chemical engineering, Sun Yat-Sen university, Guangzhou 510275, P. R. China.

E-mail: cxm@mail.sysu.edu.cn

<sup>b</sup> School of Chemistry and Chemical engineering, University of South China, Hengyang 421001, P. R. China.

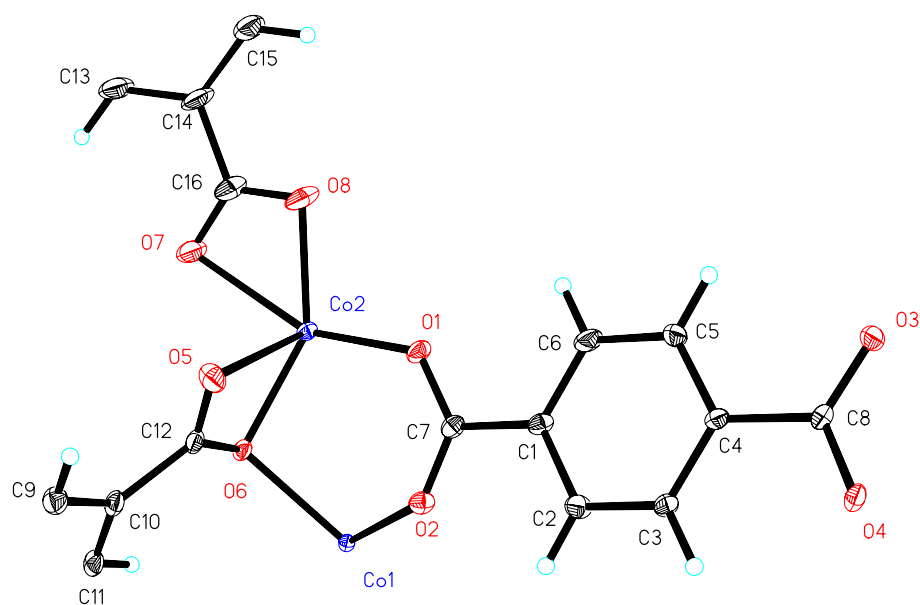

**Fig. S1.** The asymmetric coordination unit in **1** (All guests were omitted for clarity)

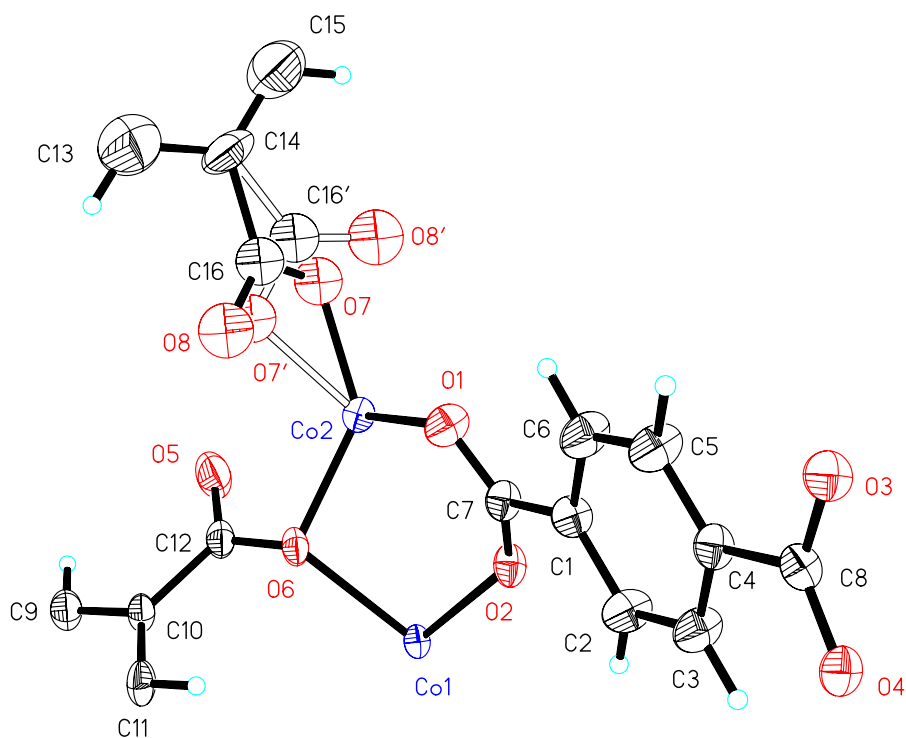

**Fig. S2.** The asymmetric coordination unit in **2** (The carboxylate group of the 1,4-bdc ligand as pillar is 2-fold disordered; all guests were omitted for clarity)

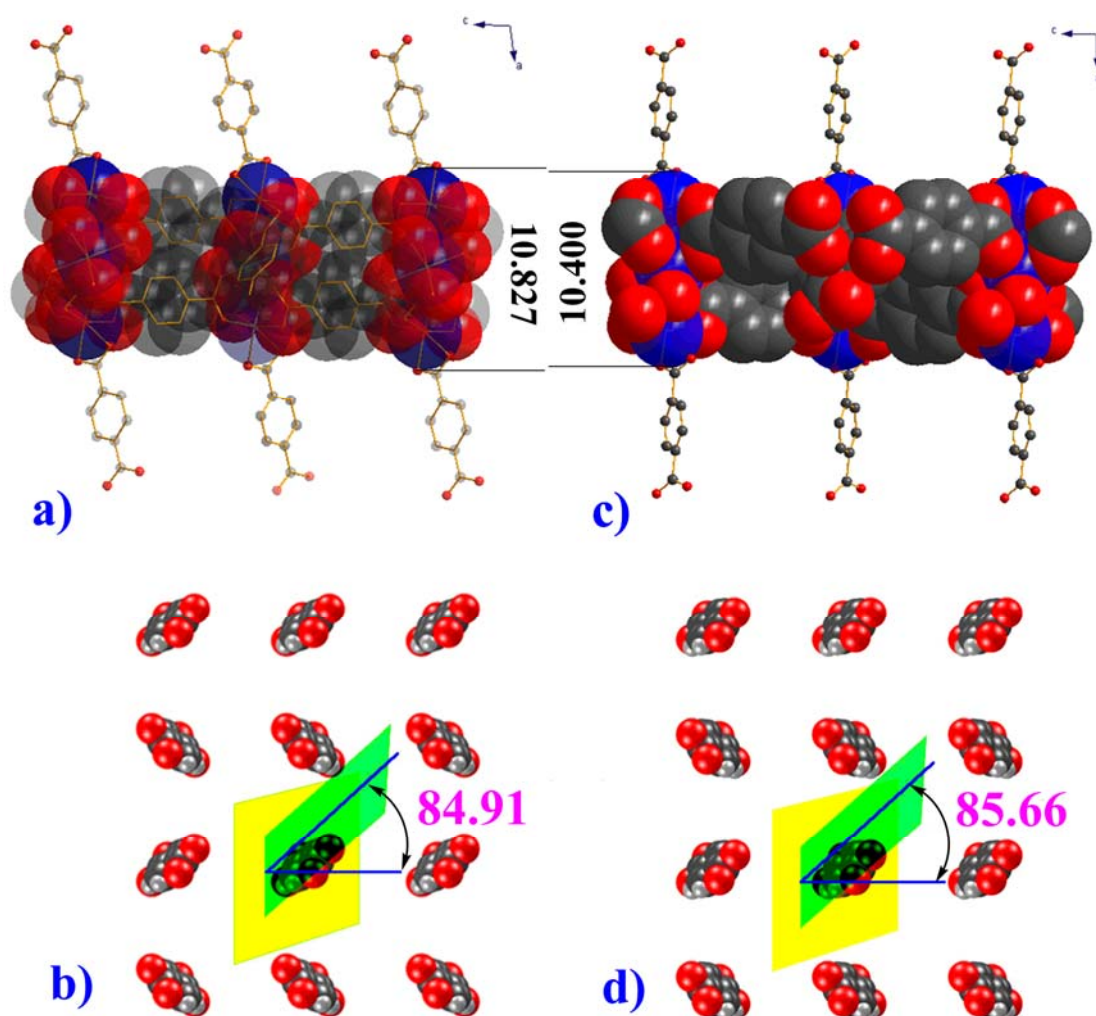

**Fig. S3.** The dissimilar thickness of the layers in **1** (a) and **2** (c); the slight different slant angles between the pillar bdc and the layer in *c*-axis in **1** (b) and **2** (d).

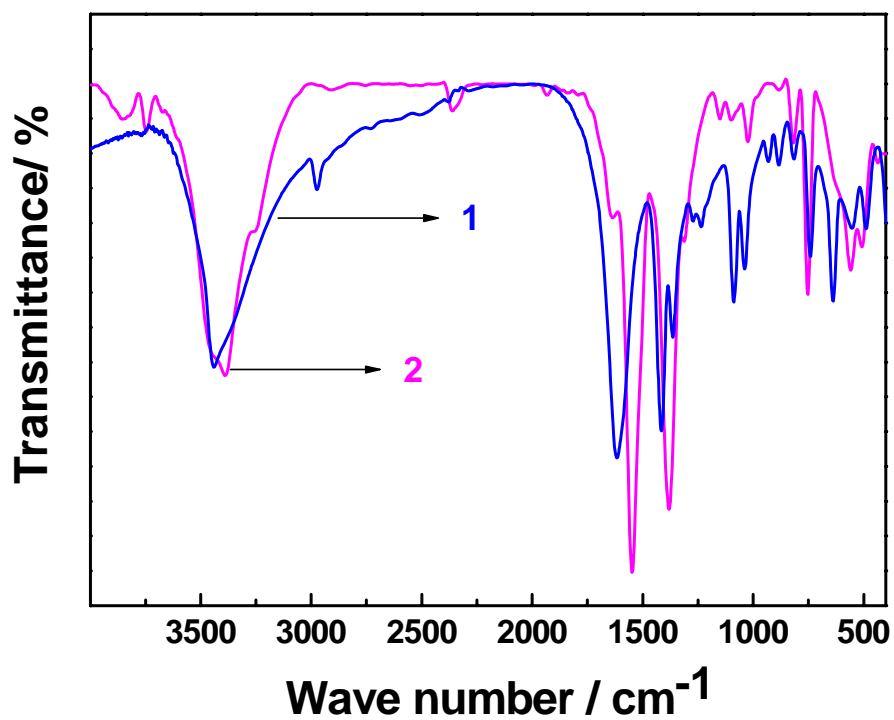

Fig. S4. The FT-IR spectra of **1** (blue) and **2** (pink).

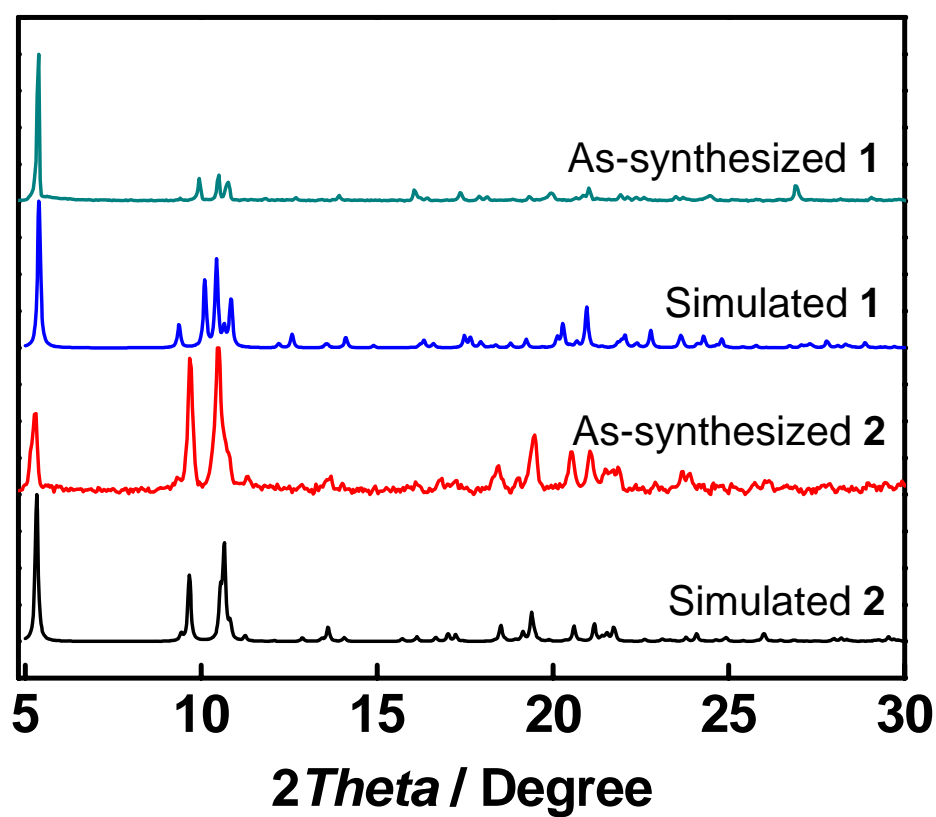

Fig. S5. Calculated and experimental powder X-ray diffraction patterns of **1** and **2**.
